# Supplementary material for: A novel, highly sensitive and specific biomarker for Niemann-Pick type C1 disease
Source: PubMed Central journal article supplement (PMC4479076; doi:10.1186/s13023-015-0274-1), 2015-06-17
Supplement: 13023_2015_274_MOESM1_ESM.pdf [file 13023_2015_274_MOESM1_ESM.pdf]

## Supplemental Figures:

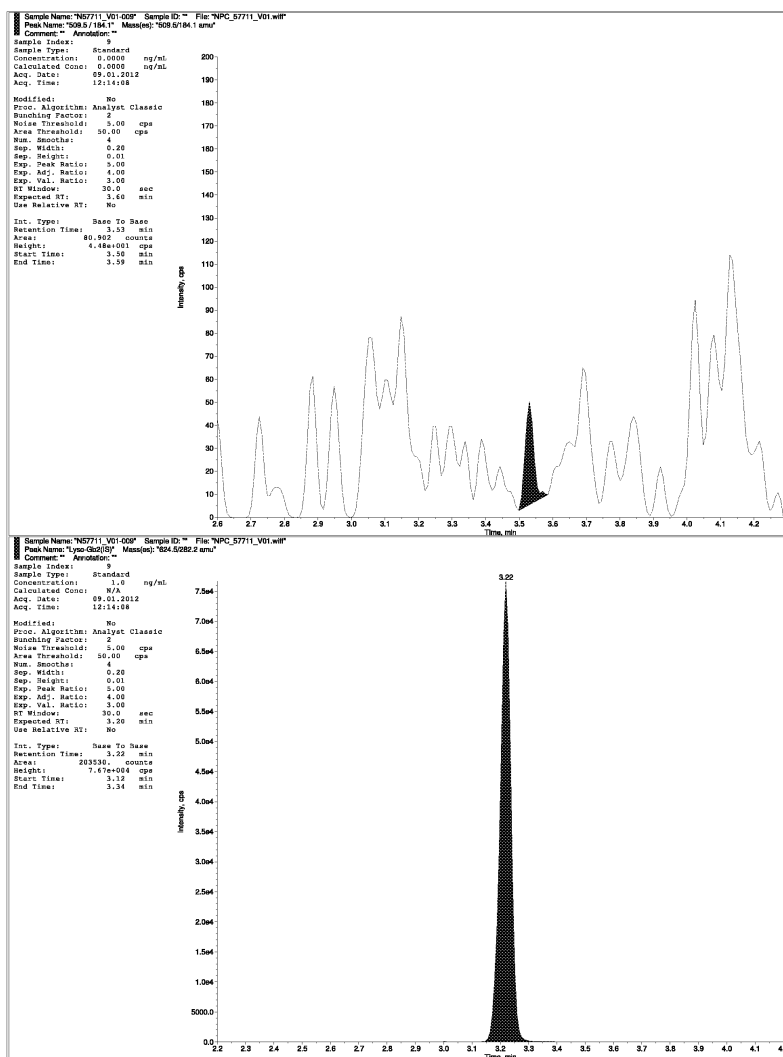

**Figure S1: Chromatogram of lyso-SM-509 (top chromatogram) in human control plasma and the internal standard (bottom) calibrated at 6ng/ml. There is almost no lyso-SM-509 detectable in the control sample.**

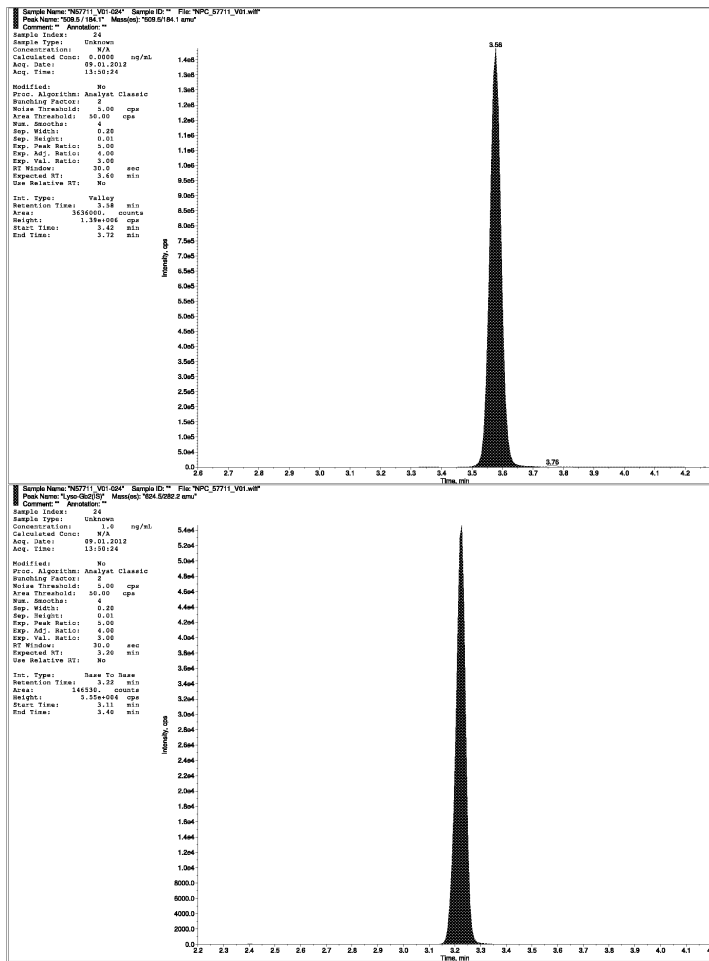

Figure S2: Chromatogram of lyso-SM-509 (top chromatogram) and internal standard (bottom) in NPC1 patient sample at a high concentration.
